# Supplementary material
Source: MDPI journal article supplement (https://www.mdpi.com/2075-163X/10/5/392)
Supplement: s1 [file s1]

**Table S1. Conditions of electron microprobe analysis of major and minor elements.**

| Element | X-ray line | XTAL <sup>a</sup> | Standard          | Peak cnt. time [s] | Det. lim. [ppm] | Overlap corrections       |
|---------|------------|-------------------|-------------------|--------------------|-----------------|---------------------------|
| Ca      | K $\alpha$ | LPET              | diopside          | 20                 | 160             |                           |
| La      | L $\alpha$ | LPET              | LaPO <sub>4</sub> | 20                 | 480             | Nd L $\beta$              |
| Ce      | L $\alpha$ | LPET              | CePO <sub>4</sub> | 20                 | 490             |                           |
| Na      | K $\alpha$ | TAP               | albite            | 20                 | 520             |                           |
| P       | K $\alpha$ | TAP               | CePO <sub>4</sub> | 10                 | 380             | Y L $\beta$ <sub>2</sub>  |
| Si      | K $\alpha$ | TAP               | SiO <sub>2</sub>  | 20                 | 165             |                           |
| F       | K $\alpha$ | LTAP              | apatite           | 10                 | 840             | Ce M $\zeta$ <sub>1</sub> |
| Mg      | K $\alpha$ | LTAP              | diopside          | 20                 | 170             |                           |
| Y       | L $\alpha$ | TAP               | YPO <sub>4</sub>  | 50                 | 350             |                           |
| Al      | K $\alpha$ | TAP               | orthoclase        | 30                 | 180             |                           |
| K       | K $\alpha$ | LPET              | orthoclase        | 20                 | 160             |                           |
| Ti      | K $\alpha$ | LPET              | TiO <sub>2</sub>  | 20                 | 190             |                           |
| Fe      | K $\alpha$ | LLIF              | hematite-SPI25    | 20                 | 430             |                           |
| Th      | M $\alpha$ | LPET              | ThO <sub>2</sub>  | 40                 | 475             |                           |
| Pr      | L $\alpha$ | LPET              | PrPO <sub>4</sub> | 20                 | 140             | La L $\beta$ <sub>1</sub> |
| Sm      | L $\alpha$ | LLIF              | SmPO <sub>4</sub> | 30                 | 660             | Ce L $\beta$ <sub>2</sub> |
| Nd      | L $\alpha$ | LPET              | NdPO <sub>4</sub> | 60                 | 290             | Ce L $\beta$ <sub>1</sub> |
| Mn      | K $\alpha$ | LLIF              | rhodonite         | 30                 | 380             |                           |

<sup>a</sup> The full names of the diffracting crystals (from the Table S1 and the section 3.1.) are as follows: LPET – Large Pentaerythritol; PETJ – Pentaerythritol J-type (JEOL); PETH – Pentaerythritol H-type (higher X-ray intensity); TAP – Thallium acid Phthalate; LTAP – Large TAP; LIF – Lithium Fluoride; LLIF – Large LIF; LIFH – LIF H-type.
